# Supplementary material for: Global and precise identification of functional miRNA targets in mESCs by integrative analysis
Source: PubMed Central journal article supplement — EMBO Rep. 2022 Jul 28;23(9):e54762. doi: 10.15252/embr.202254762 (PMC9442311; doi:10.15252/embr.202254762), 2022-07-28
Supplement: EMBR-23-e54762-s008.pdf [file EMBR-23-e54762-s008.pdf]

## Table of Contents

|                                                                                              |    |
|----------------------------------------------------------------------------------------------|----|
| Appendix Fig S1. Correlation between AGO2 binding and number of predicted miRNA interactions | p2 |
| Appendix Fig S2. Number of miRNA copies per cell, highlighting miR-290-295 cluster           | p3 |
| Fig S3. Luciferase reporter assay with Tfap4 3'UTR in HEK293T cells                          | p4 |
| References                                                                                   | p5 |

## Appendix Fig S1

A

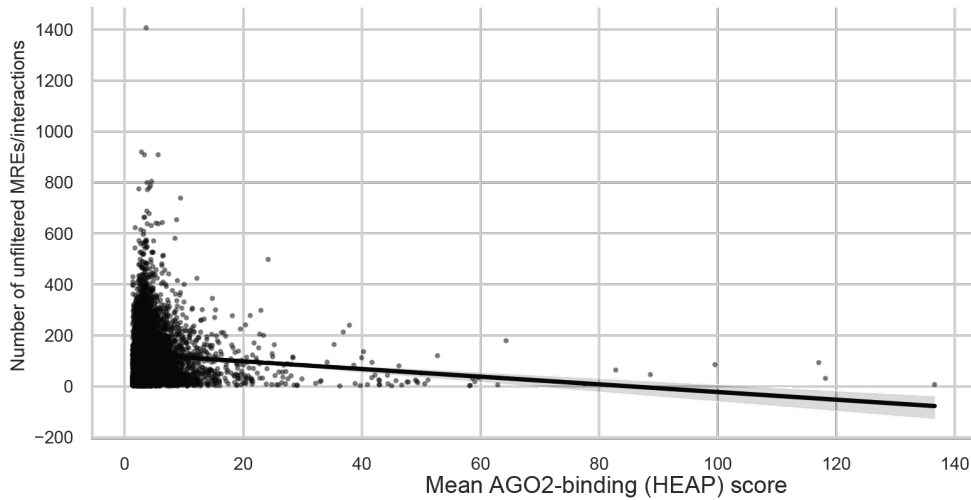

B

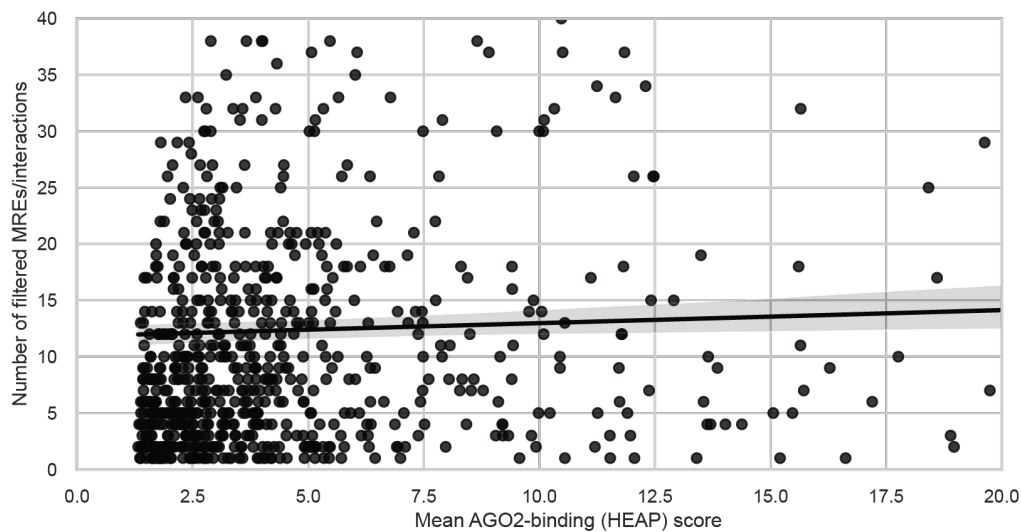

(No) correlation between the mean AGO2-binding peak intensities (HEAP) and the number of unfiltered MREs/interactions. Data are represented on a per-gene basis (one dot per gene) for unfiltered targets/interactions (A) and filtered (as described in the paper) targets/interactions (B).

A: Correlation between the number of predicted MREs (seed matching binding sites, excluding 6mers) and the mean intensity of gene-associated HEAP peaks (i.e., peak size). Pearson correlation coefficient: -0.08.

B: Correlation between the number of filtered interactions (as described in the paper) and the mean intensity of gene-associated HEAP peaks (i.e., peak size). Pearson correlation coefficient: 0.9,  $p < 0.02$ .

Appendix Fig S2

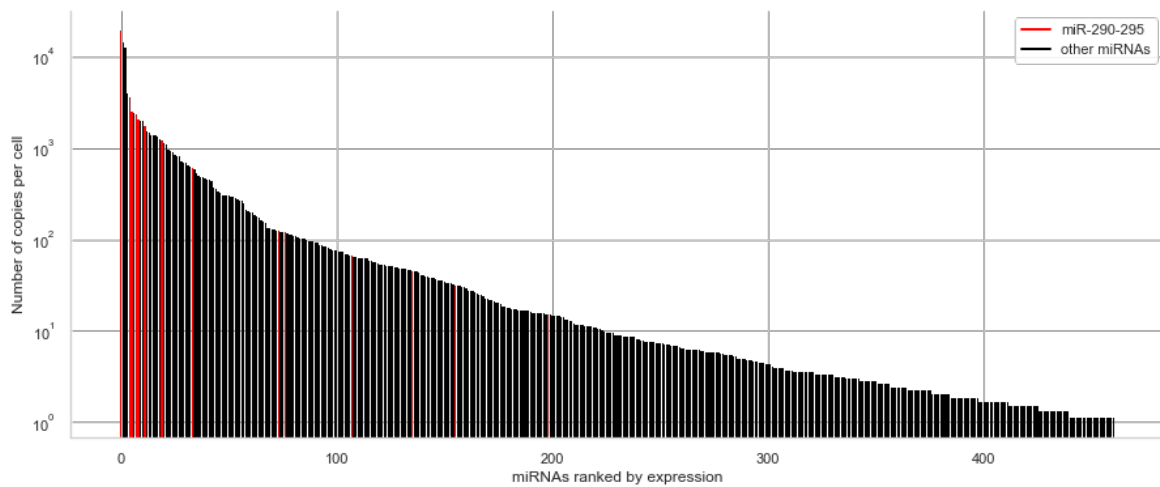

| miRNA           | Number of copies per cell |
|-----------------|---------------------------|
| mmu-miR-295-3p  | 19440                     |
| mmu-miR-292a-5p | 3556                      |
| mmu-miR-292a-3p | 2466                      |
| mmu-miR-293-5p  | 2324                      |
| mmu-miR-291a-5p | 2059                      |
| mmu-miR-293-3p  | 1723                      |
| mmu-miR-294-3p  | 1208                      |
| mmu-miR-291a-3p | 602                       |
| mmu-miR-290a-5p | 124                       |
| mmu-miR-295-5p  | 118                       |
| mmu-miR-291b-5p | 66                        |
| mmu-miR-294-5p  | 45                        |
| mmu-miR-291b-3p | 31                        |
| mmu-miR-290a-3p | 15                        |

The total number of miRNAs in mESCs has previously been estimated by (Calabrese *et al.*, 2007) at 110,000 copies per cell. Harnessing their finding, we used our sequencing data to derive the number of copies per cell for each miRNA sequence, as previously performed by (Gu *et al.*, 2016). Only miRNAs with at least 1 copy per cell are shown.

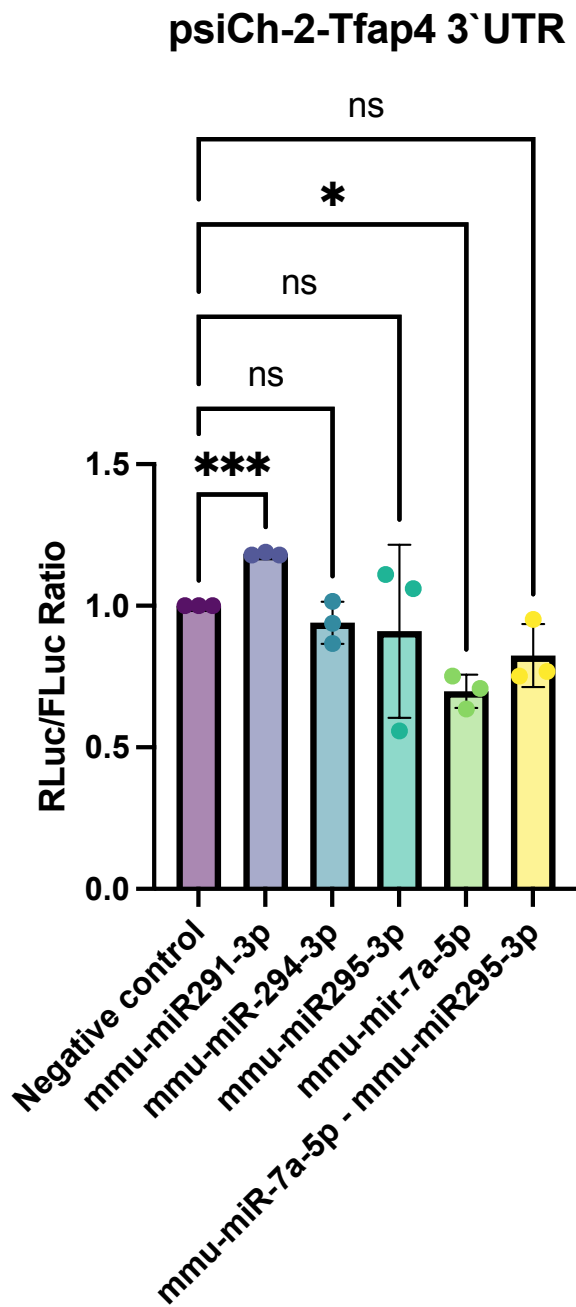

Luciferase reporter assay performed in HEK293T cells using the *Tfap4* 3'UTR, which was cloned into the psiCheck2 dual luciferase vector. Cells were transfected with the miRNA mimics listed above to a final concentration of 20 nM. Luciferase signal was measured 48 hours after transfection.

**References:**

Calabrese, J. M. *et al.* (2007) 'RNA sequence analysis defines Dicer's role in mouse embryonic stem cells', *PNAS*, 104(46), pp. 18097–18102. doi: 0709193104 [pii] 10.1073/pnas.0709193104.

Gu, K. L. *et al.* (2016) 'Pluripotency-associated miR-290/302 family of microRNAs promote the dismantling of naive pluripotency', *Cell Research*, 26(3), pp. 350–366. doi: 10.1038/cr.2016.2.
